# Supplementary material
Source: ML conference proceedings conference paper supplement (https://openreview.net/forum?id=YIxKeHQZpi)
Supplement: supplementary_material [file attachment]

---

# Supplemental Material for UNIT: Unifying Image and Text Recognition in One Vision Encoder

---

Anonymous Author(s)  
Affiliation  
Address  
email

## 1 Visualizations

Our model demonstrates significant prowess within potential real-world application scenarios, encompassing tasks such as text recognition with grounding—applicable to both natural images and unadulterated texts—markdown conversion, and Chinese text recognition. To further enhance performance, the model is meticulously fine-tuned using grounding data encompassing 200k images, and Chinese data consisting of 6M images.

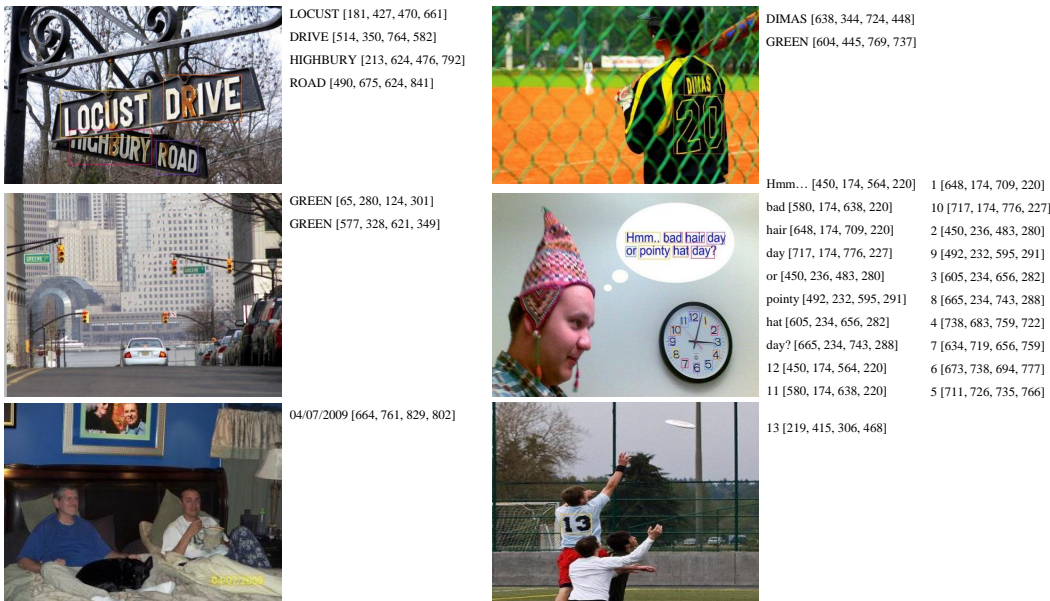

Figure 1: Samples for text recognition with grounding in images. Please see clearly by zooming in.

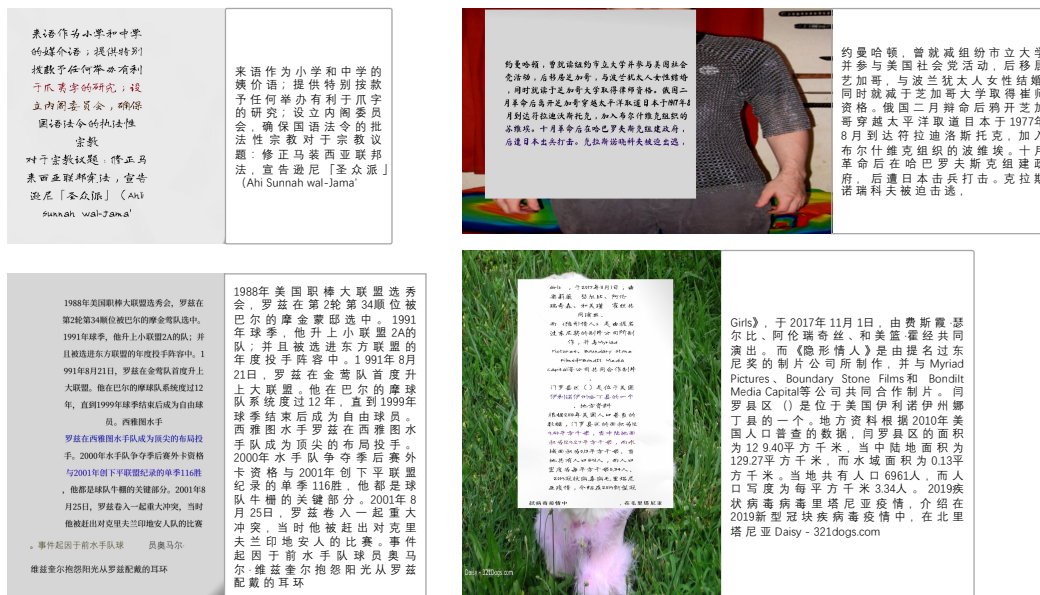

Figure 2: Samples for Chinese text recognition. Please see clearly by zooming in.

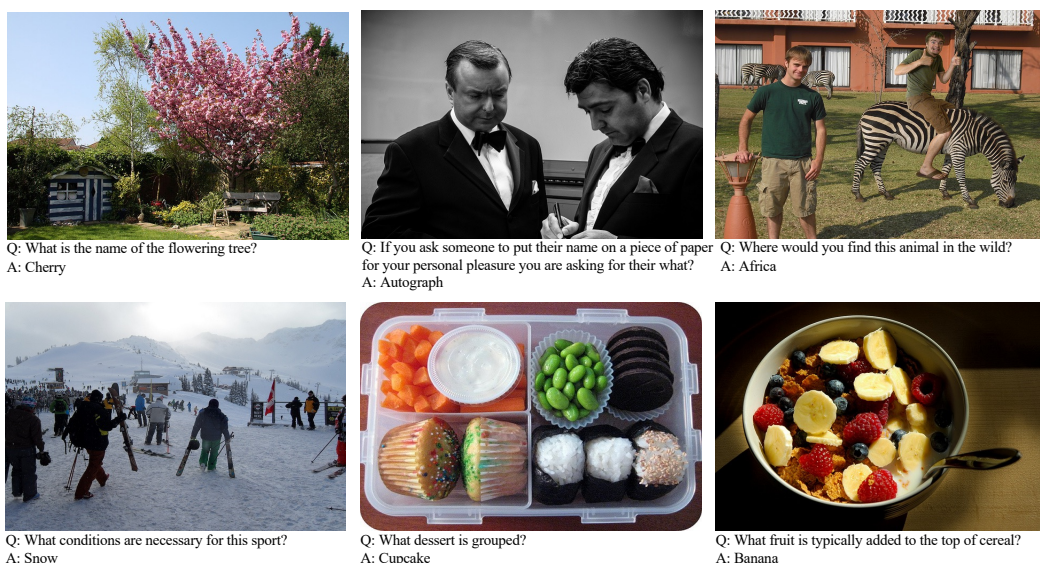

Figure 3: Samples for VQA. Please see clearly by zooming in.

Marden - Kane, Inc.

TRUE "YOU FOUND IT" SWEEPSTAKES  
SECOND PRIZE WINNER  
TRAVEL INFORMATION SHEET

THE DESTINATION IN THE CONTINENTAL UNITED STATES I WISH  
TO TRAVEL TO IS:

NAME \_\_\_\_\_  
ADDRESS \_\_\_\_\_  
CITY \_\_\_\_\_ STATE \_\_\_\_\_ ZIP \_\_\_\_\_

HOME PHONE \_\_\_\_\_  
BUSINESS PHONE \_\_\_\_\_

NAME OF GUEST \_\_\_\_\_  
AGE \_\_\_\_\_  
RELATIONSHIP TO WINNER \_\_\_\_\_

PLEASE LIST THREE ALTERNATIVE DATES YOU WOULD LIKE TO TRAVEL

1. \_\_\_\_\_
2. \_\_\_\_\_
3. \_\_\_\_\_

MAJOR AIRPORT  
NEAREST YOUR HOME \_\_\_\_\_

AIRLINE:  
(CHECK ONE) \_\_\_\_\_ SMOKING \_\_\_\_\_ NON-SMOKING

SPECIAL DIETARY REQUIREMENTS \_\_\_\_\_

ANY ADDITIONAL  
INFORMATION YOU WOULD LIKE TO PROVIDE \_\_\_\_\_

85201796

Marden - Kane, Inc. TRUE "YOU FOUND IT" SWEEPSTAKES  
SECOND PRIZE WINNER TRAVEL INFORMATION SHEET  
THE DESTINATION IN THE CONTINENTAL UNITED  
STATES I WISH TO TRAVEL TO IS: NAME ADDRESS  
CITY STATE ZIP HOME PHONE BUSINESS PHONE NAME  
OF GUEST AGE RELATIONSHIP TO WINNER PLEASE  
LIST THREE ALTERNATIVE DATES YOU WOULD LIKE  
TO TRAVEL 1. 2. 3. MAJOR AIRCORE NEAREST YOUR  
HOME AIRLINE: (CHECK ONE) SMOKING NON-  
SMOKING 85201796 SPECIAL DIETARY REQUIREMENTS  
ANY ADDITIONAL INFORMATION YOU WOULD LIKE  
TO PROVIDE

Figure 4: Samples for English text recognition. Please see clearly by zooming in.

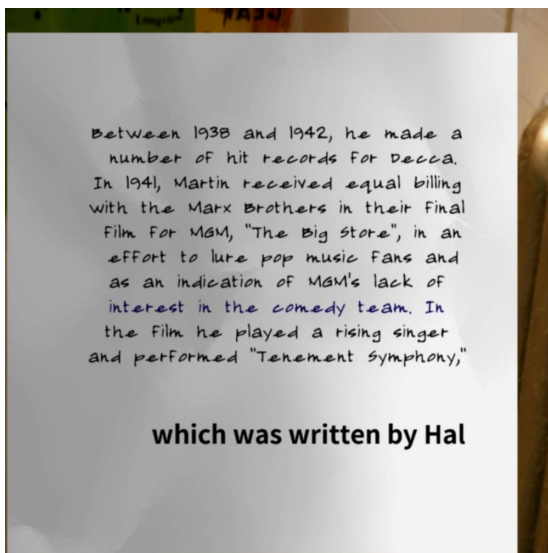

Between 1938 and 1942, he made a number of hit records for Decca. In 1941, Martin received equal billing with the Marx Brothers in their final film for MGM, "The Big Store", in an effort to lure pop music fans and as an indication of MGM's lack of interest in the comedy team. In the film he played a rising singer and performed "Tenement Symphony," which was written by Hal

Figure 5: Samples for English text recognition. Please see clearly by zooming in.

September 30, 2002

W

TO: H/Assistant Administrator for Procurement

FROM: W/Assistant Inspector General for Audits

SUBJECT: Final Report on NASA's Proposal Evaluation Process  
Assignment Number A-01-045-00  
Report Number IG-02-030

Enclosed please find the subject final report. Please refer to the Executive Summary for the overall audit results. Our evaluation of your response has been incorporated into the body of the report. The corrective actions planned and completed for the recommendations are responsive. Management's actions are sufficient to close recommendations 1 and 3 for reporting purposes. Recommendation 2 will remain open for reporting purposes until corrective actions are completed. Please notify us when action is completed on the recommendation, including the extent of testing performed to ensure corrective actions are effective. The final report distribution is in Appendix E.

We appreciate the courtesies extended to the audit staff. If you have questions concerning the report, please contact Mr. Lorne Dear, Program Director for Procurement Audits, at (818) 354-5634, or Ms. Mary S. Anderson, Auditor-in-Charge, at (301) 286-8137.

[original signed by]  
Alan J. Lamoreaux

Enclosure

September 30, 2002 TO: H/Assistant Administrator for Procurement FROM: W/Assistant Inspector General for AudITS SUBJECT: Final Report on NASA's Proposal Evaluation Process Assignment Number A-01-045-00 Report Number IC-02-030 Enclosed please find the subject final report. Please refer to the Executive Summary for the overall audit results. Our evaluation of your response has been incorporated into the body of the report. The corrective actions planned and completed for the recommendations are responsive. Management's actions are sufficient to close recommendations 1 and 3 for reporting purposes. Recommendation 2 will remain open for reporting purposes until corrective actions are completed. Please notify us when action is completed on the recommendation, including the extent of testing performed to ensure corrective actions are effective. The final report distribution is in Appendix E. We appreciate the courtees extended to the audit staff. If you have questions concerning the report, please contact Mr. Lorne Dear, Program Director for Procurement Audits, at (818) 354-5634, or Ms. Mary S. Anderson, Auditor-in-Charge, at (301) 286-8137. [original signed by] Alan J. Lamoreaux Enclosure

Figure 6: Samples for English text recognition. Please see clearly by zooming in.

Marden - Kane, Inc.

TRUE "YOU FOUND IT" SWEEPSTAKES  
SECOND PRIZE WINNER  
TRAVEL INFORMATION SHEET

THE DESTINATION IN THE CONTINENTAL UNITED STATES I WISH  
TO TRAVEL TO IS: \_\_\_\_\_

NAME \_\_\_\_\_

ADDRESS \_\_\_\_\_

CITY \_\_\_\_\_ STATE \_\_\_\_\_ ZIP \_\_\_\_\_

HOME PHONE \_\_\_\_\_

BUSINESS PHONE \_\_\_\_\_

NAME OF GUEST \_\_\_\_\_

AGE \_\_\_\_\_

RELATIONSHIP TO WINNER \_\_\_\_\_

PLEASE LIST THREE ALTERNATIVE DATES YOU WOULD LIKE TO TRAVEL

1. \_\_\_\_\_

2. \_\_\_\_\_

3. \_\_\_\_\_

MAJOR AIRPORT NEAREST YOUR HOME \_\_\_\_\_

AIRLINE: (CHECK ONE) \_\_\_\_\_ SMOKING \_\_\_\_\_ NON-SMOKING

SPECIAL DIETARY REQUIREMENTS \_\_\_\_\_

ANY ADDITIONAL INFORMATION YOU WOULD LIKE TO PROVIDE \_\_\_\_\_

85201796

Marden- Kane, Inc. TRUE "YOU FOUND IT" SWEEPSTAKES SECOND PRIZE WINNER TRAVEL INFORMATION SHEET THE DESTINATION IN THE CONTINENTAL UNITED STATES I WISH TO TRAVEL TO IS: NAME ADDRESS CITY STATE ZIP HOME PHONE BUSINESS PHONE NAME OF GUEST AGE RELATIONSHIP TO WINNER PLEASE LIST THREE ALTERNATIVE DATES YOU WOULD LIKE TO TRAVEL 1. 2. 3. MAJOR AIRCORE NEAREST YOUR HOME AIRLINE: (CHECK ONE) SMOKING NON-SMOKING 85201796 SPECIAL DIETARY REQUIREMENTS ANY ADDITIONAL INFORMATION YOU WOULD LIKE TO PROVIDE

Figure 7: Samples for English text recognition. Please see clearly by zooming in.

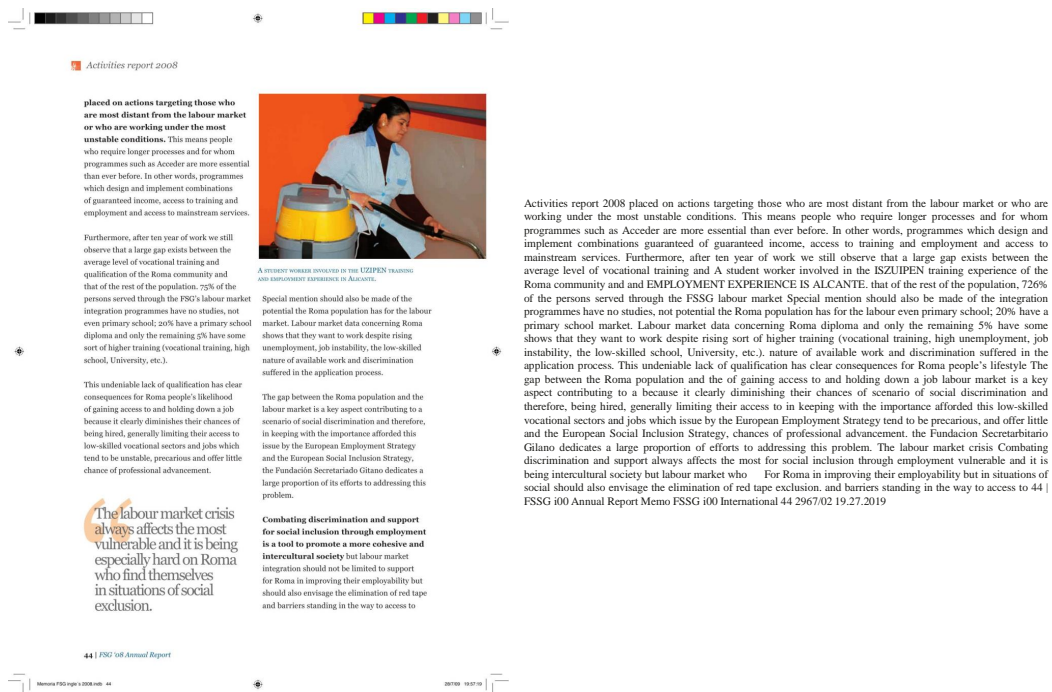

Figure 8: Samples for English text recognition. Please see clearly by zooming in.

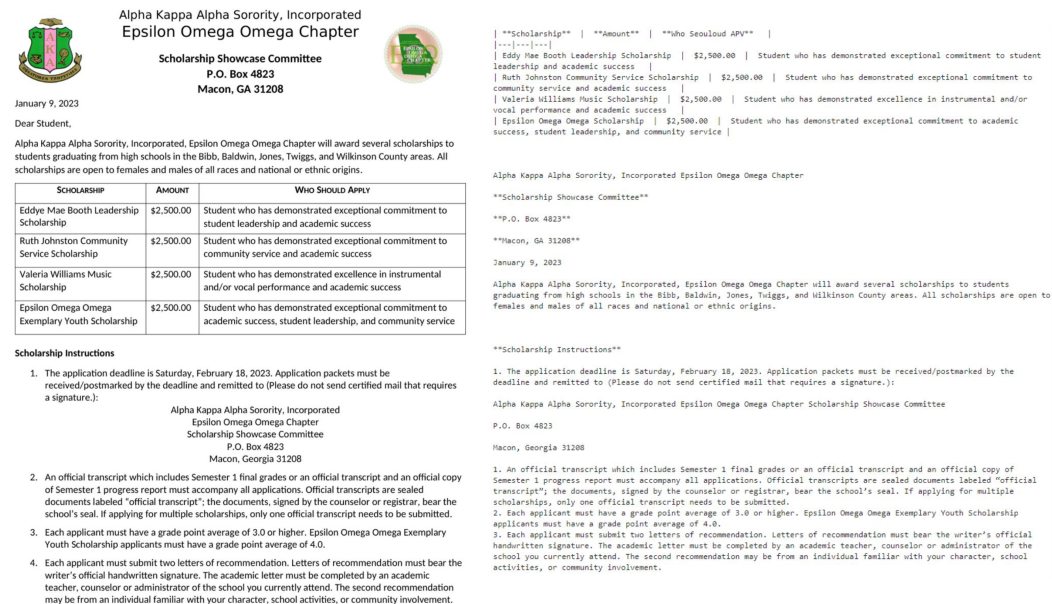

Figure 9: Samples for markdown conversion. Please see clearly by zooming in.



| Rhode Island 21 <sup>st</sup> Century Community Learning Center (21 <sup>st</sup> CCLC) grant<br>Background Check Guide<br>January 2019                                                                                                                                                                                                                                                                                                                                                                                                                                                                                                                                                                                                                                                                                                                                                                                                                                                                                                                                                                                                                                                                                                                                                                                                                                                                                                                                                                                                                                                                                                                                                                                                                                                                                                                                                                                                                                                                                                                                                                                                                                                                                                                                                                                                                                                                                                                                                                                                                                                                                                                                                                                                                                                                                                                                                                                                                                                                                                                                                                                                                                                                                                                                                                                                                                                                                                                                                                                                                                                                                                                                                                                                                                       |                                                                                                                                                                                                                                                                                                                                                                                                                                                                                                                                                                                                                                                                                                                                                                                                                                                                                                                                                                                                                                                                                                                                                                                                                                                                                                                                                                                                                                                                                                                                                                                                                                                                                                                                                                                                                                                                                                                                                                                                                                                                                                                                                                                                                                                                                                                                                                                                                                                                                                                                                                                                                                                                                                                                                                                                                                                                                                                                                                                                                                                                                                                                                                                                                                                                                                                                                                                                                                                                                                                                                                                                                                                                                                                                                                                                     |
|-------------------------------------------------------------------------------------------------------------------------------------------------------------------------------------------------------------------------------------------------------------------------------------------------------------------------------------------------------------------------------------------------------------------------------------------------------------------------------------------------------------------------------------------------------------------------------------------------------------------------------------------------------------------------------------------------------------------------------------------------------------------------------------------------------------------------------------------------------------------------------------------------------------------------------------------------------------------------------------------------------------------------------------------------------------------------------------------------------------------------------------------------------------------------------------------------------------------------------------------------------------------------------------------------------------------------------------------------------------------------------------------------------------------------------------------------------------------------------------------------------------------------------------------------------------------------------------------------------------------------------------------------------------------------------------------------------------------------------------------------------------------------------------------------------------------------------------------------------------------------------------------------------------------------------------------------------------------------------------------------------------------------------------------------------------------------------------------------------------------------------------------------------------------------------------------------------------------------------------------------------------------------------------------------------------------------------------------------------------------------------------------------------------------------------------------------------------------------------------------------------------------------------------------------------------------------------------------------------------------------------------------------------------------------------------------------------------------------------------------------------------------------------------------------------------------------------------------------------------------------------------------------------------------------------------------------------------------------------------------------------------------------------------------------------------------------------------------------------------------------------------------------------------------------------------------------------------------------------------------------------------------------------------------------------------------------------------------------------------------------------------------------------------------------------------------------------------------------------------------------------------------------------------------------------------------------------------------------------------------------------------------------------------------------------------------------------------------------------------------------------------------------------|-----------------------------------------------------------------------------------------------------------------------------------------------------------------------------------------------------------------------------------------------------------------------------------------------------------------------------------------------------------------------------------------------------------------------------------------------------------------------------------------------------------------------------------------------------------------------------------------------------------------------------------------------------------------------------------------------------------------------------------------------------------------------------------------------------------------------------------------------------------------------------------------------------------------------------------------------------------------------------------------------------------------------------------------------------------------------------------------------------------------------------------------------------------------------------------------------------------------------------------------------------------------------------------------------------------------------------------------------------------------------------------------------------------------------------------------------------------------------------------------------------------------------------------------------------------------------------------------------------------------------------------------------------------------------------------------------------------------------------------------------------------------------------------------------------------------------------------------------------------------------------------------------------------------------------------------------------------------------------------------------------------------------------------------------------------------------------------------------------------------------------------------------------------------------------------------------------------------------------------------------------------------------------------------------------------------------------------------------------------------------------------------------------------------------------------------------------------------------------------------------------------------------------------------------------------------------------------------------------------------------------------------------------------------------------------------------------------------------------------------------------------------------------------------------------------------------------------------------------------------------------------------------------------------------------------------------------------------------------------------------------------------------------------------------------------------------------------------------------------------------------------------------------------------------------------------------------------------------------------------------------------------------------------------------------------------------------------------------------------------------------------------------------------------------------------------------------------------------------------------------------------------------------------------------------------------------------------------------------------------------------------------------------------------------------------------------------------------------------------------------------------------------------------------------------|
| <p><b>Purpose</b></p> <p>21<sup>st</sup> Century Community Learning Center grantees have a legal and ethical responsibility to ensure the safety of students in their program, including having paid and volunteer staff in their program undergo background checks.</p> <p><b>State Laws</b></p> <p>Rhode Island General Laws (RIGL) <a href="#">§§16-2-18.1</a>, <a href="#">18.2</a>, and <a href="#">18.3</a> address criminal background checks of employees of public or private schools. The law states that:</p> <ul style="list-style-type: none"> <li>Current or prospective employees must apply for a national and state records check at the Attorney General's Bureau of Criminal Identification (BCI), the State Police, or the local police department where they reside.</li> <li>"Fingerprinting shall be required."</li> <li>This should be done "prior to, or within one week of, employment after receiving a conditional offer of employment."</li> <li>"Employment" means those individuals hired directly by the private school or public school department, contractual employees of the private school or public school department, and those individuals, who may have direct or unmonitored contact with children or students, who are hired by a third party who or that has contracted with the private school or public school department to provide services." This therefore applies to 21<sup>st</sup> Century CCLC grantees and their subcontracted providers, regardless of whether the district or the community-based agency are the fiscal agent; both are signatories on the grant.</li> </ul> <p>RIGL <a href="#">§§16-2-18.4</a> and <a href="#">18.5</a> address criminal background checks of volunteers of public or private schools. The law states that current or prospective volunteers "who may have direct and unmonitored contact with children and/or students" must apply for a state records check (sometimes referred to simply as a "BCI"). The law does not require a national records check for volunteers.</p> <p><b>Types of Background Checks</b></p> <p>There are many types of background checks and they vary widely in what they will reveal. The national fingerprint check only finds convictions of certain criminal offenses and is far from a guarantee that there is nothing of concern in a potential employee's background. It is, however, what is required. Other national background check services for employees that do not include fingerprinting, such as those based on social security numbers, may in fact be more effective but they do not meet the letter of the law. Grantees are encouraged to use them, but only as a supplement to fingerprinting.</p> <p>A state background check is even less extensive than the national check because it will not find any out-of-state convictions. Nonetheless, that is what is required for volunteers. Please be aware that federal rules prohibit law enforcement agencies from conducting fingerprint checks without legal authorization. They will generally refuse to conduct them for school volunteers, because Rhode Island law does not require it. 21<sup>st</sup> CCLC grantees should use the <a href="#">National Sex Offender Public Website</a> as a way to supplement the required state background check for volunteers.</p> <p><b>Policies and Procedures</b></p> <p>Grantees who use volunteers should adopt a clear volunteer policy to ensure that under no circumstances is a volunteer who has not been fingerprinted left alone with a child or youth. The policy should include specific, enforceable protocols for handling a variety of situations (e.g. students going to the bathroom, field trips, etc.).</p> | <p>""Rhode Island 21st Century Community Learning Center (21st CCLC) grant""</p> <p>""Background Check Guide""</p> <p>""January 2019""</p> <p>""Purpose""</p> <p>2nd Century Community Learning Center grantees have a legal and ethical responsibility to ensure the safety of students in their program, including having paid and volunteer staff in their program undergo background checks.</p> <p>""State Laws""</p> <p>Rhode Island General Laws (RIGL) [""§§16-2-18.1"" and [""§§18.2"" address criminal background checks of employees of public or private schools. The law states that:</p> <ul style="list-style-type: none"> <li>* Current or prospective employees must apply for a national and state records check at the Attorney General's Bureau of Criminal Identification (BCI), the State Police, or the local police department where they reside.</li> <li>* "Fingerprinting shall be required."</li> <li>* This should be done "prior to, or within one week of, employment after receiving a conditional offer of employment."</li> <li>* "Employment" means those individuals hired directly by the private school or public school department, contractual employees of the private school or public school department, and those individuals, who may have direct or unmonitored contact with children or students, who are hired by a third party who or that has contracted with the private school or public school department to provide services." This therefore applies to 21st Century CCLC grantees and their subcontracted providers, regardless of whether the district or the community-based agency are the fiscal agent, both are signatories on the grant.</li> </ul> <p>RIGL [""§§16-2-18.4"" and [""§§18.5"" address criminal background checks of volunteers of public or private schools. The law states that current or prospective volunteers "who may have direct and unmonitored contact with children and/or students" must apply for a state records check (sometimes referred to simply as a "BCI"). The law does not require a national records check for volunteers.</p> <p>""Types of Background Checks""</p> <p>There are many types of background checks and they vary widely in what they will reveal. The national fingerprint check only finds convictions of certain criminal offenses and is far from a guarantee that there is nothing of concern in a potential employee's background. It is, however, what is required. Other national background check services for employees that do not include fingerprinting, such as those based on social security numbers, may in fact be more effective but they do not meet the letter of the law. Grantees are encouraged to use them, but only as a supplement to fingerprinting.</p> <p>A state background check is even less extensive than the national check because it will not find any out-of-state convictions. Nonetheless, that is what is required for volunteers. Please be aware that federal rules prohibit law enforcement agencies from conducting fingerprint checks without legal authorization. They will generally refuse to conduct them for school volunteers, because Rhode Island law does not require it. 21st CCLC grantees should use the National Sex Offender Public Website as a way to supplement the required state background check for volunteers.</p> <p>""Policies and Procedures""</p> <p>Grantees who use volunteers should adopt a clear volunteer policy to ensure that under no circumstances is a volunteer who has not been fingerprinted left alone with a child or youth. The policy should include specific, enforceable protocols for handling a variety of situations (e.g. students going to the bathroom, field trips, etc.).</p> |

Figure 10: Samples for markdown conversion. Please see clearly by zooming in.

|  |                                                                                                                                                                                                                                                                                                                                                                                                                                                                                                                                                                                                                                                                                                                                                                                                                                                                                                                                                                                                                                                                                                                                                                                                                                                                                                                                                                                                                                          |
|--|------------------------------------------------------------------------------------------------------------------------------------------------------------------------------------------------------------------------------------------------------------------------------------------------------------------------------------------------------------------------------------------------------------------------------------------------------------------------------------------------------------------------------------------------------------------------------------------------------------------------------------------------------------------------------------------------------------------------------------------------------------------------------------------------------------------------------------------------------------------------------------------------------------------------------------------------------------------------------------------------------------------------------------------------------------------------------------------------------------------------------------------------------------------------------------------------------------------------------------------------------------------------------------------------------------------------------------------------------------------------------------------------------------------------------------------|
|  | <p>Papeke 5-27-84 [671, 140, 829, 162]</p> <p>Some [365, 155, 603, 236]</p> <p>surprising advice [159, 220, 819, 308]</p> <p>to young people [178, 295, 788, 386]</p> <p>from RJ Reynolds [158, 370, 829, 455]</p> <p>Tobacco. [329, 444, 670, 516]</p> <p>Don't smoke. [249, 532, 360, 550]</p> <p>For one thing, smoking has always been an adult custom. And [249, 552, 764, 577]</p> <p>even for adults, smoking has become very controversial. [217, 571, 675, 595]</p> <p>So even though we're a tobacco company, we don't think it's a [247, 622, 764, 613]</p> <p>good idea for young people to smoke. [217, 604, 521, 627]</p> <p>Now, we know that giving this kind of advice to young people can [247, 622, 764, 646]</p> <p>sometimes backfire. [217, 673, 477, 692]</p> <p>But if you take up smoking just to prove you're an adult, you're [247, 656, 764, 680]</p> <p>really proving just the opposite. [217, 673, 477, 692]</p> <p>Because deciding to smoke or not to smoke is something you [247, 688, 764, 711]</p> <p>should do when you don't have anything to prove. [217, 705, 599, 726]</p> <p>Think it over. [247, 722, 375, 739]</p> <p>After all, you may not be old enough to smoke. But you're old [247, 746, 764, 766]</p> <p>enough to think. [217, 764, 362, 780]</p> <p>28485 [769, 766, 842, 785]</p> <p>R.J.Reynolds Tobacco Company [448, 795, 764, 819]</p> <p>TIMN 260613 [675, 845, 818, 863]</p> |
|--|------------------------------------------------------------------------------------------------------------------------------------------------------------------------------------------------------------------------------------------------------------------------------------------------------------------------------------------------------------------------------------------------------------------------------------------------------------------------------------------------------------------------------------------------------------------------------------------------------------------------------------------------------------------------------------------------------------------------------------------------------------------------------------------------------------------------------------------------------------------------------------------------------------------------------------------------------------------------------------------------------------------------------------------------------------------------------------------------------------------------------------------------------------------------------------------------------------------------------------------------------------------------------------------------------------------------------------------------------------------------------------------------------------------------------------------|

Figure 11: Samples for English text recognition with grounding. Please see clearly by zooming in.

Traditionally, the decision criterion for accepting or rejecting modifications has been built into the testing methodology and is based on a comparison of ONE sample of the modification with ONE sample of the current process (the "control"). A great deal of energy has been spent on debating the appropriate way of doing this type of testing (paired comparisons, duo-trio, triangle, degree of difference and mixtures of these). Irrespective of the testing methodology, we have always placed great reliance on testing our results against the null hypothesis and accept/reject based on significant departures therefrom.

Traditionally, the decision criterion for accepting or rejecting [100, 247, 722, 266] modifications has been built into the testing methodology and is [100, 262, 722, 280] based on a comparison of ONE sample of the modification with ONE [100, 277, 722, 294] sample of the current process (the "control"). A great deal of [100, 292, 722, 309] energy has been spent on debating the appropriate way of doing [100, 307, 722, 325] this type of testing (paired comparisons, duo-tri, triangle, [100, 323, 722, 341] degree of difference and mixtures of these). Irrespective of the [100, 338, 722, 357] testing methodology, we have always placed great reliance on [100, 354, 722, 372] testing our results against the null hypothesis and accept/reject [100, 371, 722, 388] based on significant departures therefrom. [100, 386, 512, 402]  
2029817532 [812, 685, 841, 812]

2029817532

Figure 12: Samples for English text recognition with grounding. Please see clearly by zooming in.
